# Supplementary material for: Long Non-coding RNAs Are Central Regulators of the IL-1β-Induced Inflammatory Response in Normal and Idiopathic Pulmonary Lung Fibroblasts
Source: Front Immunol. 2018 Dec 11;9:2906. doi: 10.3389/fimmu.2018.02906 (PMC6299252; doi:10.3389/fimmu.2018.02906)
Supplement: Table S2 — Profile of lncRNA expression in human lung fibroblasts. [file Table_2.xlsx]

## Sheet: Sheet1
Gene ID	Gene Name	Chromosome/scaffold name	Gene start (bp)	Gene end (bp)	Strand	Gene type	Mean (FPKM)
ENSG00000260032	NORAD	20	36045622	36050960	-1	lincRNA	114.213
ENSG00000268388	FENDRR	16	86474529	86509099	-1	lincRNA	60.3049
ENSG00000225733	FGD5-AS1	3	14920347	14948424	-1	antisense	54.792
ENSG00000172965	MIR4435-2HG	2	111036776	111523376	-1	lincRNA	45.805
ENSG00000269893	SNHG8	4	118278709	118279823	1	lincRNA	38.9104
ENSG00000177410	ZFAS1	20	49278178	49295738	1	antisense	36.1117
ENSG00000222041	CYTOR	2	87454781	87636740	1	lincRNA	32.502
ENSG00000233016	SNHG7	9	136721366	136728184	-1	antisense	26.8048
ENSG00000214548	MEG3	14	100779410	100861031	1	lincRNA	23.2823
ENSG00000255399	TBX5-AS1	12	114408191	114412831	1	antisense	18.7198
ENSG00000233101	HOXB-AS3	17	48549630	48606414	1	antisense	14.912
ENSG00000267280	TBX2-AS1	17	61393456	61411555	-1	antisense	14.3448
ENSG00000281649	EBLN3P	9	37079857	37090507	1	lincRNA	13.9213
ENSG00000251562	MALAT1	11	65497688	65506516	1	lincRNA	13.0658
ENSG00000260260	SNHG19	16	2154797	2155358	-1	lincRNA	12.6216
ENSG00000232533	AC093673.1	7	143379692	143380495	-1	antisense	12.6168
ENSG00000253738	OTUD6B-AS1	8	91059909	91070189	-1	antisense	12.2989
ENSG00000278730	AC005332.9	17	68126666	68129586	1	lincRNA	12.2404
ENSG00000272841	AL139393.2	6	160990318	160992342	-1	antisense	11.6514
ENSG00000256940	AP001453.2	11	64245964	64248217	1	antisense	11.119
ENSG00000182165	TP53TG1	7	87325225	87345515	-1	lincRNA	10.8802
ENSG00000263753	LINC00667	18	5237826	5246508	1	lincRNA	10.8165
ENSG00000215256	DHRS4-AS1	14	23938731	23988839	-1	antisense	10.0673
ENSG00000229807	XIST	X	73820651	73852753	-1	lincRNA	9.8074
ENSG00000254635	WAC-AS1	10	28522652	28532743	-1	antisense	9.43317
ENSG00000223482	NUTM2A-AS1	10	87203875	87342612	-1	antisense	9.14473
ENSG00000255737	AGAP2-AS1	12	57726271	57728356	1	antisense	8.75585
ENSG00000257621	PSMA3-AS1	14	58265365	58298134	-1	antisense	8.12909
ENSG00000273038	AL365203.3	10	32887255	32889311	-1	lincRNA	8.05502
ENSG00000245937	LINC01184	5	127940426	128083172	-1	lincRNA	7.82227
ENSG00000237187	NR2F1-AS1	5	93409359	93585648	-1	antisense	7.71005
ENSG00000250786	SNHG18	5	9546200	9550609	1	lincRNA	7.67852
ENSG00000231312	AC007388.1	2	39436637	39665343	1	antisense	7.46076
ENSG00000261801	LOXL1-AS1	15	73908071	73928248	-1	antisense	7.3357
ENSG00000253982	AC100810.1	8	1761990	1764502	-1	antisense	6.94585
ENSG00000267575	AC006504.5	19	27793463	27918863	1	lincRNA	6.90896
ENSG00000261512	AC092368.3	16	46622861	46624451	-1	lincRNA	6.85282
ENSG00000245532	NEAT1	11	65422774	65445540	1	lincRNA	6.74556
ENSG00000251022	THAP9-AS1	4	82893009	82900960	-1	antisense	6.66088
ENSG00000235423	AC068768.1	12	123252030	123261483	-1	antisense	6.63531
ENSG00000266962	AC067852.2	17	42552436	42554748	-1	antisense	6.56428
ENSG00000226137	BAIAP2-AS1	17	81029130	81034881	-1	lincRNA	6.55176
ENSG00000236618	PITPNA-AS1	17	1516931	1518096	1	antisense	6.48954
ENSG00000166770	ZNF667-AS1	19	56477250	56500666	1	lincRNA	6.46624
ENSG00000276855	AC015922.4	17	15789016	15789705	1	lincRNA	6.28845
ENSG00000226935	LINC00161	21	28539318	28540355	1	lincRNA	6.24031
ENSG00000225484	NUTM2B-AS1	10	79663088	79826594	-1	antisense	6.16252
ENSG00000261824	LINC00662	19	27684580	27793940	-1	lincRNA	6.12486
ENSG00000229619	MBNL1-AS1	3	152262616	152269555	-1	antisense	6.07525
ENSG00000233308	OSTN-AS1	3	191213291	191234605	-1	antisense	6.06708
ENSG00000232098	AC012313.1	19	58404238	58408484	-1	lincRNA	5.94448
ENSG00000231106	LINC01436	21	36005338	36007838	1	lincRNA	5.76659
ENSG00000232677	LINC00665	19	36313067	36331718	-1	lincRNA	5.66045
ENSG00000225470	JPX	X	73944184	74070408	1	lincRNA	5.64754
ENSG00000205664	BX890604.1	X	3817528	3843857	-1	lincRNA	5.63418
ENSG00000270058	AC040170.1	16	86221423	86222729	-1	lincRNA	5.55706
ENSG00000255198	SNHG9	16	1964959	1965509	1	lincRNA	5.47949
ENSG00000261105	LMO7-AS1	13	75604700	75635994	-1	antisense	5.4495
ENSG00000267080	ASB16-AS1	17	44175973	44186717	-1	antisense	5.4474
ENSG00000248092	NNT-AS1	5	43571594	43603230	-1	antisense	5.30483
ENSG00000226688	ENTPD1-AS1	10	95753206	96090238	-1	antisense	5.25528
ENSG00000228223	HCG11	6	26521709	26527404	1	lincRNA	5.24278
ENSG00000212694	LINC01089	12	121795267	121803906	-1	lincRNA	5.13685
ENSG00000197182	MIRLET7BHG	22	46053869	46113928	1	lincRNA	5.12127
ENSG00000269968	AC006064.4	12	6537794	6538370	-1	antisense	4.97395
ENSG00000234171	RNASEH1-AS1	2	3558492	3561745	1	antisense	4.83814
ENSG00000230590	FTX	X	73946555	74293574	-1	lincRNA	4.82244
ENSG00000245060	LINC00847	5	180830957	180835726	1	lincRNA	4.6692
ENSG00000257219	LINC02407	12	76259839	76305131	1	lincRNA	4.65766
ENSG00000214293	APTR	7	77657660	77696265	-1	lincRNA	4.56086
ENSG00000249859	PVT1	8	127794533	128101253	1	lincRNA	4.53711
ENSG00000267100	ILF3-AS1	19	10651862	10653844	-1	lincRNA	4.41329
ENSG00000248008	NRAV	12	120490328	120495940	-1	antisense	4.34844
ENSG00000280798	LINC00294	11	33076149	33079454	1	lincRNA	4.34586
XLOC_096068	XLOC_096068	12	57931528	57936175	-	LincRNA	4.33677
ENSG00000272913	AC009237.14	2	95525109	95526702	-1	lincRNA	4.32062
ENSG00000254531	FLJ20021	4	101347780	101348883	1	lincRNA	4.27784
ENSG00000257605	AC073611.1	12	53298655	53300314	-1	antisense	4.18975
ENSG00000247828	TMEM161B-AS1	5	88268895	88436685	1	antisense	4.14358
ENSG00000267317	AC027307.2	19	1457670	1458580	-1	antisense	4.12695
ENSG00000233223	AC016876.1	17	7581964	7584072	-1	antisense	4.0936
ENSG00000241990	PRR34-AS1	22	46053705	46057210	1	antisense	4.06864
ENSG00000203993	ARRDC1-AS1	9	137615332	137618906	-1	antisense	4.00725
ENSG00000223749	MIR503HG	X	134543337	134546632	-1	lincRNA	4.00695
ENSG00000232977	LINC00327	13	23466571	23487464	1	lincRNA	4.00469
ENSG00000272831	AC027644.3	7	66739829	66740385	-1	antisense	3.97259
ENSG00000205181	LINC00654	20	5496067	5504613	-1	lincRNA	3.96581
ENSG00000232527	AC245595.1	1	144227030	144250288	-1	lincRNA	3.91493
ENSG00000206573	THUMPD3-AS1	3	9349689	9398579	-1	antisense	3.89349
ENSG00000233184	AC093157.1	1	101025878	101087268	1	antisense	3.88408
ENSG00000269352	PTOV1-AS2	19	49856970	49859289	-1	antisense	3.80002
ENSG00000117242	PINK1-AS	1	20642657	20652193	-1	antisense	3.79494
ENSG00000251273	LINC02228	5	25087450	25190956	-1	lincRNA	3.77023
ENSG00000197989	SNHG12	1	28578538	28582983	-1	antisense	3.76549
ENSG00000264247	LINC00909	18	74591774	74598508	-1	lincRNA	3.75785
ENSG00000231943	PGM5P4-AS1	2	113527568	113542672	-1	lincRNA	3.75126
ENSG00000245571	AP001258.1	11	59130133	59143015	-1	lincRNA	3.73355
ENSG00000227946	AC007383.2	2	206084605	206086564	1	lincRNA	3.73191
ENSG00000243701	DUBR	3	107240692	107326964	1	lincRNA	3.72847
ENSG00000267519	AC020916.1	19	13834516	13836289	-1	lincRNA	3.71329
ENSG00000225177	AL590617.2	6	138692548	138697288	1	antisense	3.69365
ENSG00000229124	VIM-AS1	10	17214239	17229985	-1	antisense	3.64386
ENSG00000270696	AC005034.3	2	75660462	75662208	1	antisense	3.62927
ENSG00000255135	AP002360.2	11	76441338	76444656	-1	lincRNA	3.57173
ENSG00000233461	AL445524.1	1	231522388	231528556	-1	antisense	3.57101
ENSG00000186594	MIR22HG	17	1711493	1717174	-1	lincRNA	3.55469
ENSG00000234608	MAPKAPK5-AS1	12	111839764	111842902	-1	lincRNA	3.54073
ENSG00000232956	SNHG15	7	44983023	44986961	-1	lincRNA	3.51206
ENSG00000226067	LINC00623	1	120913275	121009291	1	lincRNA	3.49918
ENSG00000205663	FAM239B	X	3891438	3920746	-1	lincRNA	3.4821
ENSG00000239268	AC092691.1	3	117672154	117997592	-1	lincRNA	3.42501
ENSG00000242086	LINC00969	3	195658062	195739964	1	lincRNA	3.41196
ENSG00000274605	AL355338.1	13	100086031	100088848	-1	lincRNA	3.40934
ENSG00000272695	GAS6-AS2	13	113864168	113866833	1	lincRNA	3.40014
ENSG00000227053	AC105446.1	7	101014320	101017608	-1	antisense	3.39439
ENSG00000268858	AL118506.1	20	63861212	63864293	-1	antisense	3.38806
ENSG00000255874	LINC00346	13	110863987	110870251	-1	lincRNA	3.37732
ENSG00000258017	AC011603.2	12	49127782	49147869	1	antisense	3.36943
ENSG00000250303	AP002884.3	11	112270749	112362534	1	lincRNA	3.36039
ENSG00000230074	AL162231.2	9	34665665	34681298	1	antisense	3.35607
ENSG00000233429	HOTAIRM1	7	27095647	27100265	1	antisense	3.32703
ENSG00000223891	OSER1-AS1	20	44210960	44226027	1	lincRNA	3.32204
ENSG00000206417	H1FX-AS1	3	129315392	129326225	1	antisense	3.29023
ENSG00000266208	AC080112.2	17	40360655	40364693	1	antisense	3.28269
ENSG00000247271	ZBED5-AS1	11	10858259	10906802	1	antisense	3.27484
ENSG00000259807	AC009093.1	16	29217170	29220031	-1	lincRNA	3.27158
ENSG00000230417	LINC00595	10	78179185	78551355	1	lincRNA	3.27036
ENSG00000248049	UBA6-AS1	4	67701280	68080952	1	antisense	3.26238
ENSG00000260136	AC008915.2	16	23452758	23457606	1	lincRNA	3.26054
ENSG00000249042	AC008771.1	5	80482293	80488063	-1	antisense	3.25458
ENSG00000272622	AC010735.2	2	226800146	226811029	1	lincRNA	3.2015
ENSG00000238142	BX284668.5	1	16888538	16889649	-1	lincRNA	3.20062
ENSG00000283633	AP000547.3	22	16601911	16615111	1	lincRNA	3.18408
ENSG00000242516	LINC00960	3	75672391	75679303	1	lincRNA	3.17816
ENSG00000229043	AC091729.3	7	1160374	1165267	1	antisense	3.1456
ENSG00000235501	AC105942.1	1	94927566	94963270	1	antisense	3.13014
ENSG00000272821	U62317.3	22	50523926	50524780	1	antisense	3.12254
ENSG00000257698	AC084033.3	12	57931528	57936175	-1	lincRNA	3.11794
ENSG00000272667	AC012306.2	2	127886556	127887185	1	lincRNA	3.10979
ENSG00000223652	AC106786.1	5	123087248	123090299	-1	antisense	3.05791
ENSG00000231365	AL359915.2	1	119140396	119275973	1	antisense	2.98611
ENSG00000233895	AL121761.1	20	19757708	19809675	1	lincRNA	2.98327
ENSG00000228221	LINC00578	3	177441921	177752305	1	lincRNA	2.95828
ENSG00000266573	AC018697.1	18	24725781	24929076	1	lincRNA	2.94824
ENSG00000242282	AC108488.1	2	3531813	3536873	-1	lincRNA	2.87721
ENSG00000237807	AC022034.2	8	53515171	53523931	-1	lincRNA	2.84114
ENSG00000271122	AC018647.2	7	35695214	35699413	1	antisense	2.83442
ENSG00000237036	ZEB1-AS1	10	31206278	31320447	-1	antisense	2.82536
ENSG00000246695	RASSF8-AS1	12	25939329	25959765	-1	antisense	2.80778
ENSG00000224259	LINC01133	1	159961218	159984750	1	lincRNA	2.80514
ENSG00000226380	AC016831.1	7	130876809	130913310	-1	lincRNA	2.80248
ENSG00000278834	AC073508.3	17	40648300	40649718	1	antisense	2.79754
ENSG00000246067	RAB30-AS1	11	83072066	83106719	1	lincRNA	2.77826
ENSG00000258056	AC009779.2	12	55729104	55730852	1	antisense	2.76788
ENSG00000270820	AC016727.1	2	61471188	61484130	1	antisense	2.76698
ENSG00000237298	TTN-AS1	2	178521183	178779963	1	antisense	2.72508
ENSG00000233452	STXBP5-AS1	6	146841901	147204614	-1	antisense	2.72399
ENSG00000281398	SNHG4	5	139274102	139283477	1	lincRNA	2.72061
ENSG00000259363	AC090825.1	15	99807023	99877148	1	lincRNA	2.71066
ENSG00000241764	AC002467.1	7	107742817	107744581	-1	antisense	2.7032
ENSG00000246273	SBF2-AS1	11	9758292	9811319	1	antisense	2.69828
ENSG00000263072	ZNF213-AS1	16	3110460	3134882	-1	antisense	2.69078
XLOC_045551	XLOC_045551	10	80207710	80219657	+	Antisense-Upstream	2.65546
ENSG00000248508	SRP14-AS1	15	40039311	40067290	1	lincRNA	2.65309
ENSG00000271020	AC112220.2	3	33797149	33797681	-1	lincRNA	2.62792
ENSG00000196810	CTBP1-AS2	4	1249300	1288291	1	antisense	2.60301
ENSG00000177406	AC021054.1	12	630891	663706	1	antisense	2.58818
ENSG00000257167	TMPO-AS1	12	98512973	98516422	-1	antisense	2.58048
ENSG00000256268	LINC02454	12	65602869	65612997	1	lincRNA	2.57039
ENSG00000249669	CARMN	5	149406689	149432835	1	lincRNA	2.56633
ENSG00000221990	EXOC3-AS1	5	441498	443160	-1	antisense	2.53885
ENSG00000233695	GAS6-AS1	13	113815630	113845744	1	antisense	2.53041
ENSG00000235531	MSC-AS1	8	71828167	72118393	1	antisense	2.52204
ENSG00000272870	AC097534.2	4	173363780	173370446	-1	antisense	2.50165
ENSG00000223478	AL441992.1	9	128724445	128733194	1	antisense	2.49289
ENSG00000254473	AL354920.1	9	83707594	83713378	1	antisense	2.49115
ENSG00000244879	GABPB1-AS1	15	50354959	50372202	1	antisense	2.46608
ENSG00000275764	AC092747.4	12	27037100	27038960	1	lincRNA	2.4588
ENSG00000229694	LINC00484	9	91119062	91182762	1	lincRNA	2.43617
ENSG00000254615	AC027031.2	8	106270144	106272899	1	lincRNA	2.42303
ENSG00000247572	CKMT2-AS1	5	81204084	81301560	-1	antisense	2.41752
ENSG00000230082	PRRT3-AS1	3	9947404	9954787	1	antisense	2.40722
ENSG00000267279	AC090409.1	18	61585746	61606916	-1	lincRNA	2.39688
ENSG00000256073	URB1-AS1	21	32393130	32393960	1	lincRNA	2.38652
ENSG00000274265	AC245297.3	1	149176022	149251013	1	lincRNA	2.37768
ENSG00000234449	FAM239A	X	3853010	3882317	-1	lincRNA	2.36217
ENSG00000230615	AL139220.2	1	44030443	44115913	1	lincRNA	2.34518
ENSG00000175611	LINC00476	9	95759231	95875977	-1	lincRNA	2.34149
ENSG00000240875	LINC00886	3	156747346	156817062	-1	lincRNA	2.33756
ENSG00000230487	PSMG3-AS1	7	1570073	1589626	1	lincRNA	2.33557
ENSG00000280206	AC026401.3	16	15701237	15702118	1	lincRNA	2.32823
ENSG00000272142	AL359643.3	6	5029972	5043449	1	lincRNA	2.32162
ENSG00000270504	AL391422.3	6	3751111	3753871	1	antisense	2.32016
ENSG00000225791	TRAM2-AS1	6	52577307	52583993	1	lincRNA	2.31733
ENSG00000231607	DLEU2	13	49982552	50125720	-1	antisense	2.31414
ENSG00000268895	A1BG-AS1	19	58347751	58355183	1	antisense	2.29565
ENSG00000246089	AC016065.1	8	6403551	6407142	-1	antisense	2.29385
ENSG00000260804	LINC01963	2	216217045	216220192	1	lincRNA	2.28687
ENSG00000231889	TRAF3IP2-AS1	6	111483511	111598302	1	antisense	2.27299
ENSG00000227036	LINC00511	17	72323123	72640472	-1	lincRNA	2.2697
ENSG00000258634	AL160006.1	1	110058340	110062555	1	antisense	2.26015
ENSG00000186019	AC021092.1	19	44105463	44113145	-1	antisense	2.2565
ENSG00000240476	LINC00973	3	98981058	98983096	1	lincRNA	2.25553
ENSG00000251257	AC010457.1	5	38460925	38468339	-1	antisense	2.25285
ENSG00000253161	LINC01605	8	37421341	37554183	-1	lincRNA	2.2465
ENSG00000270607	AC009549.1	11	19710934	19712619	-1	lincRNA	2.23623
ENSG00000224032	EPB41L4A-AS1	5	112160526	112164276	1	lincRNA	2.2247
ENSG00000244479	OR2A1-AS1	7	144300395	144356181	-1	antisense	2.21116
ENSG00000274333	CU633967.1	21	5553637	5614880	1	lincRNA	2.20185
ENSG00000225377	NRSN2-AS1	20	320313	348224	-1	antisense	2.19294
ENSG00000254614	AP003068.2	11	65177606	65181834	-1	antisense	2.1928
ENSG00000277782	AC068870.2	15	80999593	80999981	-1	lincRNA	2.19277
ENSG00000230555	AL450326.1	10	43420738	43422100	1	lincRNA	2.18545
ENSG00000223485	LINC01615	6	169158092	169162924	-1	lincRNA	2.17848
ENSG00000235578	AC007731.3	22	20343203	20344365	-1	lincRNA	2.17186
ENSG00000177337	DLGAP1-AS1	18	3593732	3598352	1	antisense	2.16592
ENSG00000255857	PXN-AS1	12	120201291	120213138	1	antisense	2.1511
ENSG00000230513	THAP7-AS1	22	21001886	21010342	1	antisense	2.14647
ENSG00000239332	LINC01119	2	46816697	46859007	1	lincRNA	2.12865
ENSG00000225746	MEG8	14	100894770	101038859	1	lincRNA	2.10847
ENSG00000259071	AL359397.2	14	50326526	50327909	-1	lincRNA	2.10504
ENSG00000260852	FBXL19-AS1	16	30919319	30923269	-1	antisense	2.09833
ENSG00000259768	AC004943.2	16	72665170	72791624	1	antisense	2.09663
ENSG00000247092	SNHG10	14	95532297	95534872	-1	antisense	2.09218
ENSG00000205885	C1RL-AS1	12	7108052	7122501	1	antisense	2.0895
ENSG00000179523	EIF3J-AS1	15	44527257	44536923	-1	lincRNA	2.08649
ENSG00000255284	AP006621.3	11	777578	784297	1	lincRNA	2.07845
ENSG00000261327	AC134312.5	16	88177298	88178941	-1	lincRNA	2.07792
ENSG00000237149	ZNF503-AS2	10	75401519	75408982	1	antisense	2.07352
ENSG00000230606	AC092683.1	2	97416165	97433527	-1	lincRNA	2.07202
ENSG00000244625	MIATNB	22	26672767	26780207	1	lincRNA	2.06914
ENSG00000265485	LINC01915	18	24628182	24662198	1	lincRNA	2.06547
ENSG00000237188	AC242426.3	1	147172771	147211568	1	antisense	2.05174
ENSG00000235884	LINC00941	12	30795681	30802711	1	lincRNA	2.04968
ENSG00000270194	AC097359.2	3	37241789	37244177	-1	antisense	2.03684
ENSG00000233621	LINC01137	1	37454879	37474411	-1	antisense	2.03342
ENSG00000246100	LINC00900	11	115754248	115760627	-1	lincRNA	2.02984
ENSG00000249673	NOP14-AS1	4	2934899	2961738	1	antisense	2.02246
ENSG00000253716	MINCR	8	143280161	143281690	-1	antisense	2.01855
ENSG00000230148	HOXB-AS1	17	48543551	48551250	1	antisense	2.01422
ENSG00000253200	AC037459.3	8	22613908	22616657	-1	antisense	2.00967
ENSG00000250132	AC004803.1	12	974133	991190	-1	antisense	2.00427
ENSG00000272341	AL137003.2	6	16764346	16766883	1	lincRNA	2.00357
ENSG00000247081	BAALC-AS1	8	103156990	103298772	-1	antisense	2.00054
ENSG00000248866	USP46-AS1	4	52659406	52661668	1	lincRNA	1.99724
ENSG00000271936	AC012073.1	2	24825610	24826717	1	antisense	1.98064
ENSG00000198468	FLVCR1-AS1	1	212852108	212858088	-1	lincRNA	1.97552
ENSG00000259943	AL050341.2	1	40256427	40257967	-1	antisense	1.97362
ENSG00000251580	LINC02482	4	6648696	6673896	-1	lincRNA	1.96642
ENSG00000283175	AC007920.2	3	187291272	187297933	1	antisense	1.96292
ENSG00000277067	CU634019.1	21	7048891	7087229	1	lincRNA	1.96119
ENSG00000228801	AC064807.1	8	51899325	51947173	1	antisense	1.95605
ENSG00000260630	SNAI3-AS1	16	88663298	88687186	1	antisense	1.94776
ENSG00000261613	AC093525.6	16	2554060	2556060	-1	antisense	1.94405
ENSG00000280721	LINC01943	2	87439523	87459044	-1	lincRNA	1.94213
ENSG00000182648	LINC01006	7	156472196	156640654	-1	lincRNA	1.92016
ENSG00000275180	AC048341.3	12	62603909	62604399	1	lincRNA	1.91461
ENSG00000236859	NIFK-AS1	2	121649650	121728481	1	antisense	1.90916
ENSG00000267547	AC060766.4	17	35403837	35404373	-1	lincRNA	1.90363
ENSG00000245556	SCAMP1-AS1	5	78342365	78360507	-1	lincRNA	1.88778
ENSG00000271976	AC012467.2	3	53858994	53861576	-1	antisense	1.87877
ENSG00000247240	UBL7-AS1	15	74461265	74481302	1	antisense	1.87355
ENSG00000226328	NUP50-AS1	22	45133020	45163781	-1	lincRNA	1.86708
ENSG00000228106	AL392172.1	1	222815022	222837384	1	lincRNA	1.85763
ENSG00000229931	AL137003.1	6	16761138	16762652	1	antisense	1.85063
ENSG00000272168	CASC15	6	21664772	22368328	1	lincRNA	1.84777
ENSG00000258297	AP001157.1	11	66666036	66668374	1	antisense	1.84286
ENSG00000244198	AC004889.1	7	144194858	144280547	1	antisense	1.8398
ENSG00000269439	AC010618.3	19	17488990	17511889	-1	lincRNA	1.83232
ENSG00000153363	LINC00467	1	211382803	211435333	1	lincRNA	1.81799
ENSG00000234684	SDCBP2-AS1	20	1325405	1378734	1	antisense	1.81177
ENSG00000253552	HOXA-AS2	7	27107777	27134302	1	antisense	1.81172
ENSG00000271584	LINC02550	11	111091932	111179641	-1	lincRNA	1.80865
ENSG00000234883	MIR155HG	21	25561909	25575168	1	lincRNA	1.80403
ENSG00000225439	BOLA3-AS1	2	74148009	74150061	1	antisense	1.79926
ENSG00000187013	C17orf82	17	61411751	61413280	1	lincRNA	1.78273
ENSG00000197180	CH17-340M24.3	X	154424380	154428479	-1	lincRNA	1.76535
ENSG00000233527	ZNF529-AS1	19	36573070	36594708	1	antisense	1.74693
ENSG00000234546	LINC01759	1	9182004	9196284	1	lincRNA	1.7396
ENSG00000273576	AC009283.1	17	39566915	39567559	1	lincRNA	1.73334
ENSG00000215067	ALOX12-AS1	17	6876635	7012349	-1	antisense	1.73296
ENSG00000250903	GMDS-AS1	6	2245748	2482022	1	lincRNA	1.72764
ENSG00000228274	AL021707.2	22	38667585	38681820	-1	antisense	1.72761
ENSG00000249592	AC139887.2	4	762387	781849	-1	antisense	1.72137
ENSG00000256628	ZBTB11-AS1	3	101676475	101679217	1	antisense	1.70265
ENSG00000229852	AC019205.2	6	73263215	73301401	1	antisense	1.68946
ENSG00000253210	AC040970.1	8	141126044	141129961	-1	antisense	1.6882
ENSG00000236914	LINC01852	15	38069481	38072959	-1	lincRNA	1.68653
ENSG00000274425	AC114271.1	19	10333436	10336248	1	antisense	1.6813
ENSG00000267321	LINC02001	17	35568109	35574843	1	lincRNA	1.67954
ENSG00000272086	AC025181.2	5	32174471	32175272	1	lincRNA	1.67005
ENSG00000271643	AC112220.4	3	33795688	33796950	-1	lincRNA	1.6624
ENSG00000283103	AC010642.2	19	58310449	58326933	-1	antisense	1.65068
ENSG00000269176	AP001160.3	11	62786023	62786785	-1	antisense	1.65067
ENSG00000272993	AC239868.4	1	149845816	149846486	1	lincRNA	1.64309
ENSG00000260025	AC009414.2	2	36354749	36355114	-1	lincRNA	1.6394
ENSG00000269293	ZSCAN16-AS1	6	28121795	28137293	-1	antisense	1.6393
ENSG00000260708	AL118516.1	22	46761894	46762563	-1	antisense	1.63504
ENSG00000278175	GLIDR	9	39748514	39810097	-1	lincRNA	1.62619
ENSG00000254682	AP002387.1	11	71448674	71452157	1	antisense	1.61568
ENSG00000224152	AC009506.1	2	159615296	159617082	1	antisense	1.58337
ENSG00000268001	CARD8-AS1	19	48255675	48258199	1	antisense	1.58009
ENSG00000281508	CDR1	X	140783176	140784660	1	antisense	1.57219
ENSG00000272106	AL691432.2	1	1613758	1615795	-1	antisense	1.56803
ENSG00000237310	GS1-124K5.4	7	66493706	66495474	1	lincRNA	1.56313
ENSG00000234160	AL513165.1	9	37509150	37510299	1	antisense	1.56212
ENSG00000224023	FLJ37035	10	125700436	125719566	-1	lincRNA	1.55821
ENSG00000255517	AP002748.3	11	66473490	66480233	-1	antisense	1.55622
ENSG00000223546	LINC00630	X	102769161	102885406	1	lincRNA	1.54324
ENSG00000267309	AC092295.2	19	36489649	36491040	1	antisense	1.53987
ENSG00000269386	RAB11B-AS1	19	8374373	8390685	-1	antisense	1.53375
ENSG00000213888	LINC01521	22	31346777	31348719	1	lincRNA	1.53068
ENSG00000233864	TTTY15	Y	12662334	12692233	1	lincRNA	1.52796
ENSG00000247796	AC008966.1	5	53109842	53115126	1	antisense	1.52049
ENSG00000246430	LINC00968	8	56496246	56559823	-1	lincRNA	1.51781
ENSG00000273014	AC018645.2	7	32758882	32759353	1	lincRNA	1.51726
ENSG00000233554	B4GALT1-AS1	9	33166975	33179983	1	antisense	1.51044
ENSG00000248927	AC114284.1	5	120781218	120790778	1	lincRNA	1.50679
ENSG00000282057	AC092807.3	1	85482281	85578250	-1	lincRNA	1.50436
ENSG00000268996	MAN1B1-AS1	9	137084946	137086817	-1	antisense	1.50323
ENSG00000275964	AL355001.2	13	19863858	19865048	1	lincRNA	1.50037
ENSG00000246560	AC018797.2	4	102828055	102844075	1	antisense	1.49943
ENSG00000165511	C10orf25	10	44997698	45000888	-1	antisense	1.49067
ENSG00000272447	AL135925.1	10	79825902	79827602	1	lincRNA	1.48722
ENSG00000259642	ST20-AS1	15	79922771	79926993	1	antisense	1.48462
ENSG00000258738	AL121603.2	14	34874343	34876459	1	antisense	1.47935
ENSG00000234072	AC074117.1	2	27356246	27367622	1	antisense	1.4744
ENSG00000247498	GPRC5D-AS1	12	12927726	12984645	1	antisense	1.4715
ENSG00000272468	AL021807.1	6	27122657	27123221	-1	lincRNA	1.4667
ENSG00000258727	AL135999.1	14	23561097	23568073	1	antisense	1.46134
ENSG00000228506	AL513550.1	6	99424922	99431373	1	antisense	1.44581
ENSG00000170161	AL512625.1	9	62897449	62900104	1	lincRNA	1.43415
ENSG00000272644	AC097468.3	2	219069354	219069809	-1	lincRNA	1.43207
ENSG00000280832	GSEC	11	126340889	126355587	-1	antisense	1.42508
ENSG00000253320	AZIN1-AS1	8	102864300	102977876	1	antisense	1.422
ENSG00000273382	AL356488.3	1	109087971	109090858	-1	antisense	1.41992
ENSG00000275765	AC091982.4	5	151770242	151771508	-1	lincRNA	1.41907
ENSG00000232442	MHENCR	20	63627227	63628824	1	antisense	1.41622
ENSG00000273466	AC012510.1	2	218633256	218634014	-1	antisense	1.41526
ENSG00000251602	AL928654.2	14	105416884	105419739	-1	antisense	1.41461
ENSG00000257732	AC089983.1	12	104262314	104280722	-1	antisense	1.4138
ENSG00000274561	AC005332.6	17	68131462	68131907	1	lincRNA	1.40862
ENSG00000235652	AL356599.1	6	145799409	145886585	1	antisense	1.40861
ENSG00000272711	AC019069.1	2	74832655	74833987	-1	lincRNA	1.40393
ENSG00000228288	PCAT6	1	202810954	202812156	1	antisense	1.3975
ENSG00000231770	TMEM44-AS1	3	194584011	194590260	1	antisense	1.3905
ENSG00000213904	LIPE-AS1	19	42397128	42652355	1	antisense	1.38821
ENSG00000277631	PGM5P3-AS1	9	72674	88826	1	lincRNA	1.38559
ENSG00000262227	AC004771.3	17	4987706	4988446	1	antisense	1.3842
ENSG00000260018	AC040169.1	16	84117051	84117571	1	antisense	1.38115
ENSG00000274712	AC005332.7	17	68205489	68207493	1	lincRNA	1.37739
ENSG00000255455	AP003486.1	11	130866254	130870247	-1	lincRNA	1.37732
ENSG00000259426	AC027237.3	15	69396904	69415029	-1	antisense	1.36576
ENSG00000262903	AC027796.4	17	3655621	3658092	-1	antisense	1.36568
ENSG00000163364	LINC01116	2	176629589	176637931	-1	lincRNA	1.36479
ENSG00000277283	AC004812.2	12	120116907	120119000	1	antisense	1.3616
ENSG00000167912	AC090152.1	8	59119040	59121346	1	antisense	1.35254
ENSG00000266680	AL135905.2	6	63571005	63572408	-1	antisense	1.34478
ENSG00000224043	CCNT2-AS1	2	134735464	134918710	-1	antisense	1.34415
ENSG00000267405	AC005180.1	17	44794747	44797783	-1	lincRNA	1.3401
ENSG00000267254	ZNF790-AS1	19	36797518	36828115	1	antisense	1.33913
ENSG00000255031	AP002807.1	11	68050740	68053762	1	antisense	1.3363
ENSG00000233901	LINC01503	9	129332300	129359538	1	lincRNA	1.33249
ENSG00000284693	AL928921.2	1	9425094	9440564	-1	lincRNA	1.32878
ENSG00000224846	AL133351.1	6	2989722	2999134	-1	antisense	1.32301
ENSG00000267169	AC022098.1	19	14137179	14171267	1	antisense	1.31783
ENSG00000273297	AC009275.1	7	134416290	134432453	-1	lincRNA	1.31295
ENSG00000240963	AL645465.1	1	244375100	244409592	-1	antisense	1.31272
ENSG00000257086	AP001453.3	11	64246939	64249494	-1	lincRNA	1.30532
ENSG00000248690	HAS2-AS1	8	121639293	121644693	1	antisense	1.302
ENSG00000260442	ATP2A1-AS1	16	28878957	28879920	-1	antisense	1.30002
ENSG00000204802	AL590399.1	9	62374128	62376836	-1	lincRNA	1.29855
ENSG00000236810	ELOA-AS1	1	23760382	23778287	-1	antisense	1.29845
ENSG00000236263	AC234582.2	1	155211151	155213819	-1	antisense	1.29835
ENSG00000275496	CU633906.1	21	6228966	6267317	-1	lincRNA	1.29055
ENSG00000227540	DNAJC9-AS1	10	73252791	73254349	1	antisense	1.28838
ENSG00000245105	A2M-AS1	12	9065177	9068060	1	antisense	1.27591
ENSG00000253948	AC104986.2	8	98996763	99013044	-1	lincRNA	1.27271
ENSG00000255121	AP003392.4	11	118994824	118998004	-1	lincRNA	1.27079
ENSG00000256034	AP002770.1	11	73760563	73761070	1	antisense	1.27047
ENSG00000271882	AP001330.5	8	101208148	101208558	1	lincRNA	1.26529
ENSG00000238266	LINC00707	10	6779598	6842906	1	lincRNA	1.26037
ENSG00000257337	AC068888.1	12	53014596	53054438	-1	antisense	1.25976
ENSG00000267667	AC005856.1	17	61130704	61135964	-1	antisense	1.25653
ENSG00000241316	SUCLG2-AS1	3	67654697	67947713	1	lincRNA	1.25575
ENSG00000267886	AC074135.1	19	23075201	23100361	1	lincRNA	1.25065
ENSG00000265688	MAFG-AS1	17	81927829	81930753	1	antisense	1.24975
ENSG00000272502	AC104958.2	8	120812219	120813359	1	antisense	1.24853
ENSG00000259877	AC009113.1	16	89215211	89217653	-1	antisense	1.24728
ENSG00000269937	AC093525.7	16	2561471	2565096	-1	antisense	1.23949
ENSG00000239213	NCK1-AS1	3	136841726	136862054	-1	antisense	1.23938
ENSG00000228436	AL139260.1	1	38860000	38919396	1	antisense	1.23606
ENSG00000272686	AC006333.2	7	123749068	123751166	1	antisense	1.2319
ENSG00000234665	AL512625.3	9	62856999	62898087	-1	lincRNA	1.23091
ENSG00000223797	ENTPD3-AS1	3	40313802	40453329	-1	antisense	1.22953
ENSG00000273314	AC005229.4	7	148696467	148698664	-1	antisense	1.22308
ENSG00000249684	AC106795.2	5	177950335	177963960	1	antisense	1.2172
ENSG00000272143	FGF14-AS2	13	102394630	102395703	1	lincRNA	1.21263
ENSG00000266916	ZNF793-AS1	19	37497159	37507046	-1	antisense	1.20901
ENSG00000240207	AC080013.1	3	158732263	158784070	1	antisense	1.20554
ENSG00000259775	AL138976.2	14	103331674	103332367	-1	antisense	1.20401
ENSG00000267454	ZNF582-AS1	19	56393656	56399172	1	lincRNA	1.20386
ENSG00000255495	AC145124.1	8	12194467	12196280	1	antisense	1.19985
ENSG00000237352	LINC01358	1	58933643	59240555	1	lincRNA	1.1882
ENSG00000267002	AC060780.1	17	43148368	43171037	-1	lincRNA	1.18684
ENSG00000232995	RGS5	1	163244505	163321894	-1	antisense	1.18296
ENSG00000259343	TMC3-AS1	15	81324377	81518200	1	antisense	1.17711
XLOC_049778	XLOC_049778	10	4745566	4764106	-	LincRNA	1.17116
ENSG00000259291	ZNF710-AS1	15	90074512	90082207	-1	antisense	1.1697
ENSG00000250988	SNHG21	15	82750564	82757206	1	antisense	1.16956
ENSG00000255243	AC099687.1	11	26189123	26208347	1	lincRNA	1.16759
ENSG00000268205	AC005261.2	19	57304305	57308562	1	lincRNA	1.16217
XLOC_201913	XLOC_201913	2	178413632	178441914	+	Antisense	1.16198
ENSG00000267201	LINC01775	19	2458935	2462185	-1	lincRNA	1.16195
ENSG00000225206	MIR137HG	1	97933474	98049863	-1	lincRNA	1.15703
ENSG00000272599	AC016394.1	10	73124573	73125532	-1	antisense	1.15683
ENSG00000265458	AC132938.3	17	82454273	82458521	-1	antisense	1.15645
ENSG00000272455	AL391244.3	1	1409096	1410618	1	lincRNA	1.15489
ENSG00000258376	AC004846.1	14	73242651	73245979	-1	antisense	1.15151
ENSG00000254109	RBPMS-AS1	8	30382119	30385401	-1	antisense	1.1491
ENSG00000260267	AC026471.1	16	31456711	31459736	-1	antisense	1.14726
ENSG00000203930	LINC00632	X	140709767	140772679	1	lincRNA	1.1385
ENSG00000232679	LINC01705	1	222041705	222064763	-1	lincRNA	1.13826
ENSG00000183250	LINC01547	21	44932814	44939913	-1	lincRNA	1.13148
ENSG00000235904	RBMS3-AS3	3	29264194	29290726	-1	antisense	1.12998
ENSG00000225554	AL359764.1	1	241424292	241433492	1	lincRNA	1.12841
ENSG00000232229	LINC00865	10	89829510	89840861	1	lincRNA	1.12657
ENSG00000269973	AC010969.2	2	9936360	9939590	1	lincRNA	1.1247
ENSG00000258077	AC078923.1	12	75563202	75984015	-1	lincRNA	1.12414
ENSG00000229334	AC046143.1	3	194632923	194645401	1	antisense	1.12258
ENSG00000261526	AC012615.1	19	1874871	1876169	-1	lincRNA	1.12046
ENSG00000272288	AL451165.2	6	34696317	34697470	1	antisense	1.1186
ENSG00000246174	KCTD21-AS1	11	78139771	78175323	1	antisense	1.11839
ENSG00000272941	AC083862.2	7	135168403	135169547	1	antisense	1.11755
ENSG00000235823	OLMALINC	10	100373513	100454043	1	lincRNA	1.11708
ENSG00000262001	DLGAP1-AS2	18	3603000	3608336	1	antisense	1.11548
ENSG00000247809	NR2F2-AS1	15	96110040	96327361	-1	antisense	1.11321
ENSG00000250742	LINC02381	12	54126098	54142493	1	lincRNA	1.11168
ENSG00000234494	SP2-AS1	17	47897330	47941410	-1	antisense	1.10922
ENSG00000251259	AC004069.1	4	105137280	105140619	-1	lincRNA	1.10508
ENSG00000248932	AC097103.2	3	139389815	139583319	1	antisense	1.10474
ENSG00000261730	AL034346.1	6	1383790	1385066	-1	antisense	1.10344
ENSG00000259865	AL390728.6	1	247187281	247188526	-1	lincRNA	1.10213
ENSG00000255224	AC109322.1	8	144078002	144079265	-1	antisense	1.09946
ENSG00000216895	AC009403.1	7	155611231	155645205	-1	antisense	1.0964
ENSG00000203706	SERTAD4-AS1	1	210231456	210234047	-1	antisense	1.09442
ENSG00000257702	LBX2-AS1	2	74502595	74504678	1	antisense	1.09264
ENSG00000275055	AC011468.5	19	52049007	52049754	1	antisense	1.09081
ENSG00000196741	LINC01560	X	47483571	47484823	1	lincRNA	1.08789
ENSG00000223969	AC002456.1	7	90590619	90597353	-1	antisense	1.08587
ENSG00000223764	AL645608.1	1	916865	921016	-1	lincRNA	1.08457
ENSG00000257599	OVCH1-AS1	12	29389289	29487488	1	antisense	1.0841
ENSG00000228526	MIR34AHG	1	9148011	9198906	-1	lincRNA	1.08154
ENSG00000250320	AC113383.1	5	84384427	84490765	1	antisense	1.07579
ENSG00000272661	AC021097.1	7	151240399	151240972	1	antisense	1.07478
ENSG00000270959	LPP-AS2	3	188151206	188154057	-1	antisense	1.06507
ENSG00000264964	AP001033.1	18	9315194	9334441	-1	lincRNA	1.06179
ENSG00000261971	MMP25-AS1	16	3051096	3059370	-1	antisense	1.06065
ENSG00000277991	FP236241.1	21	7669397	7681742	-1	lincRNA	1.05688
ENSG00000224660	SH3BP5-AS1	3	15254184	15264493	1	antisense	1.05588
ENSG00000226711	FAM66C	12	8180209	8216151	1	antisense	1.05376
ENSG00000271133	AC004130.1	7	20328299	20331747	-1	antisense	1.0503
ENSG00000249898	MCPH1-AS1	8	6618475	6708209	-1	antisense	1.0493
ENSG00000277701	AC159540.2	2	97281904	97291780	1	lincRNA	1.04727
ENSG00000260552	AC023043.1	18	36179996	36187448	-1	antisense	1.04402
ENSG00000267858	MZF1-AS1	19	58559129	58574797	1	antisense	1.04143
ENSG00000273015	AC008124.1	12	45718046	45727775	-1	lincRNA	1.04109
ENSG00000235927	NEXN-AS1	1	77881348	77889539	-1	antisense	1.04097
ENSG00000272172	AC138696.2	8	143290399	143290621	-1	antisense	1.03976
ENSG00000257261	AC008014.1	12	46383679	46876159	1	lincRNA	1.03821
ENSG00000230844	ZNF674-AS1	X	46545493	46548408	1	lincRNA	1.0278
ENSG00000259065	AC005520.2	14	73787360	73803270	1	antisense	1.02638
ENSG00000235513	AL035681.1	22	41209122	41217627	-1	antisense	1.01578
ENSG00000271870	AC024060.1	3	3152942	3153435	1	antisense	1.01365
ENSG00000261373	VPS9D1-AS1	16	89711856	89718165	1	antisense	1.01341
ENSG00000230630	DNM3OS	1	172136531	172144794	-1	antisense	1.01061
ENSG00000236144	TMEM147-AS1	19	35540738	35546029	-1	antisense	1.00815
ENSG00000232600	TONSL-AS1	8	144437675	144439971	1	antisense	1.00759
ENSG00000259863	SH3RF3-AS1	2	109127327	109128930	-1	lincRNA	1.00746
ENSG00000262049	AC139530.1	17	81701324	81703300	-1	antisense	1.00658
ENSG00000276851	AC002401.4	17	50094065	50094647	1	lincRNA	1.0065
ENSG00000247735	AC120114.1	16	29926836	29928933	1	antisense	1.00423
ENSG00000274565	AC080038.1	17	62626437	62627590	-1	antisense	1.00125
ENSG00000248869	LINC02511	4	136796722	137212799	-1	lincRNA	1.00116
